# Supplementary material for: Spectroelectrochemical and computational studies of tetrahydrocannabinol (THC) and carboxy-tetrahydrocannabinol (THC-COOH)
Source: Royal Society of Chemistry journal article supplement (doi:10.1039/c9an02173f), 2020-01-01
Supplement: c9an02173f1.pdf [file c9an02173f1.pdf]

**Supporting Information: Spectroelectrochemical and Computational Studies of Tetrahydrocannabinol (THC) and carboxy-Tetrahydrocannabinol (THC-COOH)**

Shruti D. Bindesri<sup>a</sup>, Ricardo Jebrailey<sup>a</sup>, Najwan Albarghouthi<sup>a</sup>, Cory C. Pye<sup>a</sup>, Christa L. Brosseau<sup>a\*</sup>

**Table of Contents**

|                                                                                                                                                                                                |           |
|------------------------------------------------------------------------------------------------------------------------------------------------------------------------------------------------|-----------|
| Computational Studies – Methodology                                                                                                                                                            | Page 2    |
| <b>Figure S-1:</b> Chemical structures included in calculations                                                                                                                                | Pages 3-4 |
| <b>Table S-1:</b> Calculated Raman modes for THC and THC-COOH, along with vibrational mode assignment                                                                                          | Pages 5-7 |
| <b>Figure S-2.</b> Comparison of experimental EC-SERS signal obtained for THC at -0.4 V (top) with calculated normal Raman modes for THC using B3LYP/6-31G* level of theory (bottom)           | Page 8    |
| <b>Figure S-3.</b> Comparison of experimental EC-SERS signal obtained for THC-COOH at -0.4 V (top) with calculated normal Raman modes for THC-COOH using B3LYP/6-31G* level of theory (bottom) | Page 9    |

## Computational Studies - Methodology

A series of smaller model molecules were calculated first. **Phenol** ( $C_s$  #1) prefers to have its hydroxyl group in the plane of the benzene ring, with the higher energy alternative ( $C_s$  #2) being the conformational transition state (~12 kJ/mol) connecting the two isoenergetic forms. **Dimethylbenzopyranol** prefers to be nonplanar ( $C_1$ ) in one of two forms, with the form with the hydroxo group pointing away from the pyran ring ( $C_1$  #1) preferred by 5-8 kJ/mol. The planar form ( $C_s$  #1) is the transition state (~2.5 kJ/mol) connecting the two stereoisomers. **Dimethyldihydrobenzopyranol** is also nonplanar ( $C_1$ ) in one of two forms, with the form with the hydroxo group pointing away from the dihydropyran ring ( $C_1$  #1) preferred by 5-8 kJ/mol. The planar  $C_s$  forms are second-order saddle points. **meta-Pentylphenol** can have one of four  $C_s$  forms, differing in the hydroxyl and pentyl orientation with little energetic difference between them (1 kJ/mol). Scans about the dihedral angle connecting the ring to the pentyl chain indicate that nonplanar  $C_1$  form would be preferred. The two  $C_1$  structures thus derived are nearly isoenergetic, but lower than the  $C_s$  forms by 5-8 kJ/mol. These calculations establish the preferred conformation of the hydroxyl group and the pentyl side-chain. For the larger molecules that follow, none of the MP2 calculations were attempted for computational expediency. Two low-energy forms ( $C_1$  #1, #2) of **pentyldimethylbenzopyranol** were found to be essentially isoenergetic (0.05 kJ/mol), and the same holds true of **pentyldimethyldihydrobenzopyranol** (0.1 kJ/mol). The barrier to their interconversion via a more planar benzo(dihydro)pyranol ring would be low. Next, the ring systems of several cannabinoids were constructed (without the pentyl groups). **Cannabinol (no pentyl)**  $C_s$  #1 and  $C_1$  #1 differ in energy by 12-13 kJ/mol. **7,8-dihydrocannabinol (no pentyl)** and **12,13-dihydrocannabinol (no pentyl)** have no symmetry, and the latter is more stable by 30-40 kJ/mol. **7,8,12,13-tetrahydrocannabinol (no pentyl)** also has no symmetry

phenol C<sub>s</sub> #1

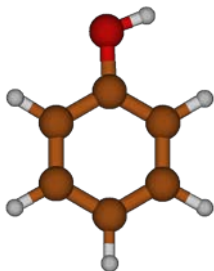

phenol C<sub>s</sub> #2

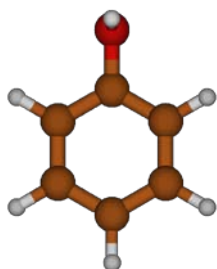

dimethylbenzo-  
pyranol C<sub>s</sub> #1

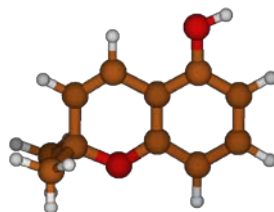

dimethylbenzo-  
pyranol C<sub>1</sub> #1

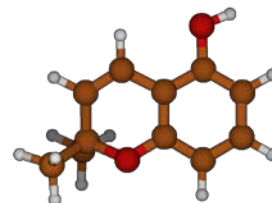

dimethylbenzo-  
pyranol C<sub>s</sub> #2

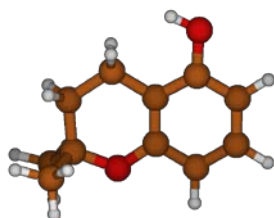

dimethylbenzo-  
pyranol C<sub>1</sub> #2

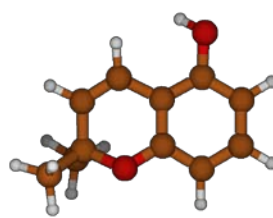

dimethyldihydro-  
benzopyranol C<sub>s</sub> #1

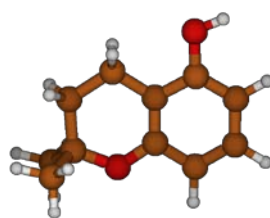

dimethyldihydro-  
benzopyranol C<sub>1</sub> #1

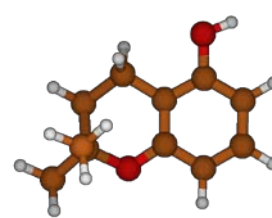

dimethyldihydro-  
benzopyranol C<sub>s</sub> #2

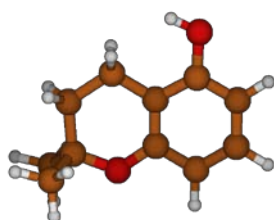

dimethyldihydro-  
benzopyranol C<sub>1</sub> #2

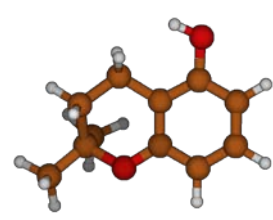

pentylphenol C<sub>s</sub> #1

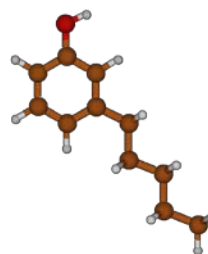

pentylphenol C<sub>s</sub> #2

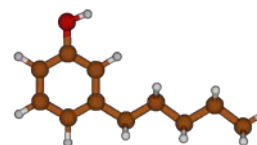

pentylphenol C<sub>1</sub> #1

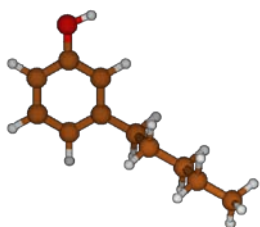

pentylphenol C<sub>s</sub> #3

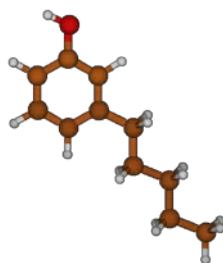

pentylphenol C<sub>s</sub> #4

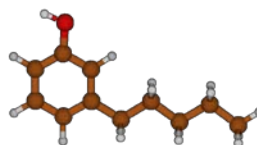

pentylphenol C<sub>1</sub> #2

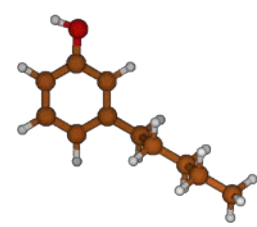

pentylmethylbenzopyranol  
C<sub>1</sub> #1

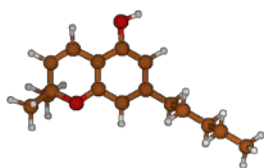

pentylmethylbenzopyranol  
C<sub>1</sub> #2

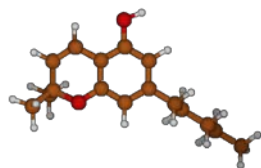

pentylmethyl-dihydrobenzo-  
pyranol C<sub>1</sub> #1

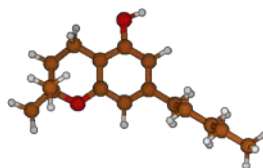

pentylmethyl-dihydrobenzo-  
pyranol C<sub>1</sub> #2

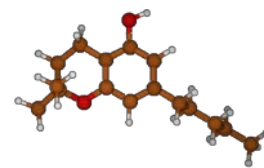

cannabinol (no pentyl) C<sub>8</sub> #1

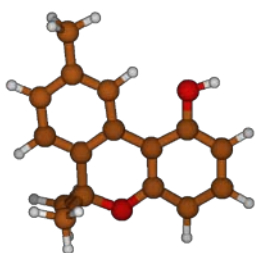

cannabinol (no pentyl) C<sub>1</sub> #1

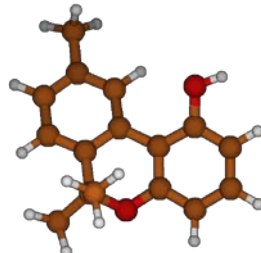

7,8-dihydrocannabinol (no  
pentyl) C<sub>1</sub> #1

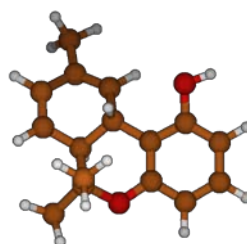

12,13-dihydrocannabinol (no  
pentyl) C<sub>1</sub> #1

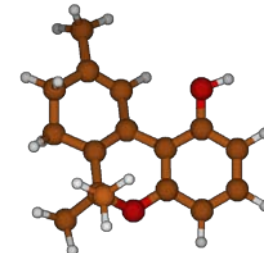

tetrahydrocannabinol (no  
pentyl) C<sub>1</sub> #1

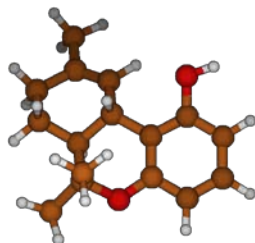

cannabinol C<sub>1</sub> #1

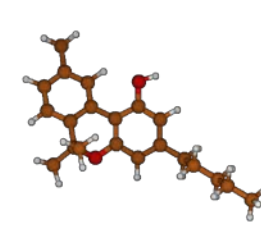

tetrahydrocannabinol C<sub>1</sub> #1

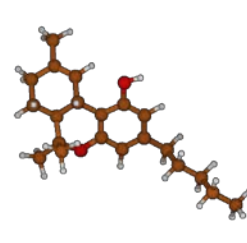

norcarboxytetrahydrocannabi-  
nol C<sub>1</sub> #1

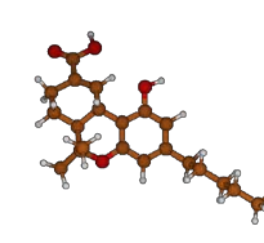

**Figure S-1.** Model structures examined for computational work

**Table 1.** Calculated Raman modes for THC and THC-COOH, along with vibrational mode assignment.

| <b>Tetrahydrocannabinol (THC)</b>            |                                                    | <b>11-Nor-9-Carboxy-THC (THC-COOH)</b>       |                                     |
|----------------------------------------------|----------------------------------------------------|----------------------------------------------|-------------------------------------|
| Calculated Raman<br>Shift / cm <sup>-1</sup> | Band Assignment                                    | Calculated Raman<br>Shift / cm <sup>-1</sup> | Band Assignment                     |
| 361                                          | OH twist                                           | 352                                          | OH twist, mixed                     |
| 416                                          | Mixed, methyl rock                                 | 402                                          | Mixed, methyl rock                  |
| 442                                          | Mixed, $\delta$ (C-C)                              | 444                                          | Mixed, $\delta$ (C-C)               |
| 474                                          | Mixed, $\delta$ (Me-C)                             | 484                                          | Methyl scissor                      |
| 493                                          | ring def                                           | 494                                          | ring def                            |
| 505                                          | ip def (ring)                                      | 504                                          | ip def (ring)                       |
| 550                                          | ip def (ring)                                      | 547                                          | ip def (ring)                       |
| 577                                          | ip def (ring)                                      | 578                                          | OH torsion / carboxyl<br>twist      |
| 613                                          | oop def (ring)                                     | 616                                          | oop def (ring)                      |
| 686                                          | ip def (ring)                                      | 686                                          | ring def                            |
| 737                                          | oop def (ring)                                     | 736                                          | oop def (ring)                      |
| 784                                          | CH <sub>2</sub> rock (ring) + CH<br>oop def        |                                              |                                     |
| 798                                          | CH <sub>2</sub> rock, $\nu$ (C-C=C)                | 794                                          | CH <sub>2</sub> rock, $\nu$ (C-C=C) |
| 856                                          | CH oop def (ring) +<br>CH <sub>2</sub> def (chain) |                                              |                                     |
| 893                                          | Me rock + CH oop                                   | 880                                          | C-O str. (ring)                     |

|      |                                                   |      |                                                      |
|------|---------------------------------------------------|------|------------------------------------------------------|
| 904  | Chain Me rock                                     | 903  | Chain Me rock                                        |
| 924  | CH <sub>2</sub> rock                              |      |                                                      |
| 946  | CH <sub>3</sub> rock, ring def.                   | 941  | CH <sub>3</sub> rock, ring def.                      |
| 1007 | CH <sub>3</sub> rock, v(C-C)                      | 1007 | CH <sub>3</sub> rock, v(C-C)                         |
| 1013 | CH <sub>3</sub> rock, v(C-C)                      | 1015 | CH <sub>3</sub> rock, v(C-C)                         |
| 1041 | v(C-C)                                            | 1032 | CH <sub>3</sub> rock, v(C-C)                         |
| 1065 | v(C-C)                                            | 1065 | v(C-C)                                               |
| 1108 | v(C-C) ring                                       | 1107 | v(C-C)                                               |
| 1127 | v(C-C=C)                                          | 1129 | v(C-C=C)                                             |
| 1131 | v(C-C) alkyl chain                                | 1131 | v(C-C) alkyl chain                                   |
| 1176 | $\delta$ (H-C=C), v(C-C),<br>CH <sub>3</sub> rock | 1181 | $\delta$ (H-C=C), v(C-C),<br>CH <sub>3</sub> rock    |
| 1206 | $\delta$ (O-H), ring twist                        | 1209 | $\delta$ (O-H), ring twist                           |
| 1239 | v(C-C) ring                                       | 1240 | mixed, CH ip def +<br>OH def + CC str                |
| 1265 | CH <sub>2</sub> twist ring                        | 1263 | CH <sub>2</sub> twist ring                           |
| 1311 | $\delta$ (C-H) (ring junction)                    | ---  | ---                                                  |
| 1344 | CH <sub>2</sub> twist chain                       | 1344 | CH <sub>2</sub> twist chain                          |
| 1362 | CH <sub>2</sub> twist ring + HCC<br>ip bend       | 1360 | CH <sub>2</sub> twist ring + HCC<br>ip bend+ CC str. |
| 1387 | CH <sub>2</sub> wag, $\delta$ (=C-H)              | 1387 | CH <sub>2</sub> wag, $\delta$ (=C-H)                 |

|      |                                      |      |                                                        |
|------|--------------------------------------|------|--------------------------------------------------------|
| 1401 | ip def, coupled to<br>$\delta(=C-H)$ | 1404 | ip def, coupled to<br>$\delta(=C-H)$                   |
| 1426 | $\delta_s(CH_3)$                     | 1421 | CH ip bend + CH <sub>2</sub><br>wag + $\delta_s(CH_3)$ |
| 1496 | $\delta_s(CH_3)$                     | 1496 | $\delta_s(CH_3)$                                       |
| 1507 | CH scissor, acyl chain               | 1508 | CH scissor, acyl chain                                 |
| 1517 | $\delta_{as}(CH_3)$                  | 1517 | $\delta_{as}(\text{chain } CH_3)$                      |
| 1612 | $\nu(C-C=C)$ localized               | 1613 | $\nu(C-C=C)$ localized                                 |
| 1659 | $\nu(C-C=C)$                         | 1660 | $\nu(C-C=C)$                                           |
| 1719 | $\nu(C=C)$                           | 1686 | $\nu(C=C)$                                             |
| ---  | ---                                  | 1767 | $\nu(C=O)$                                             |

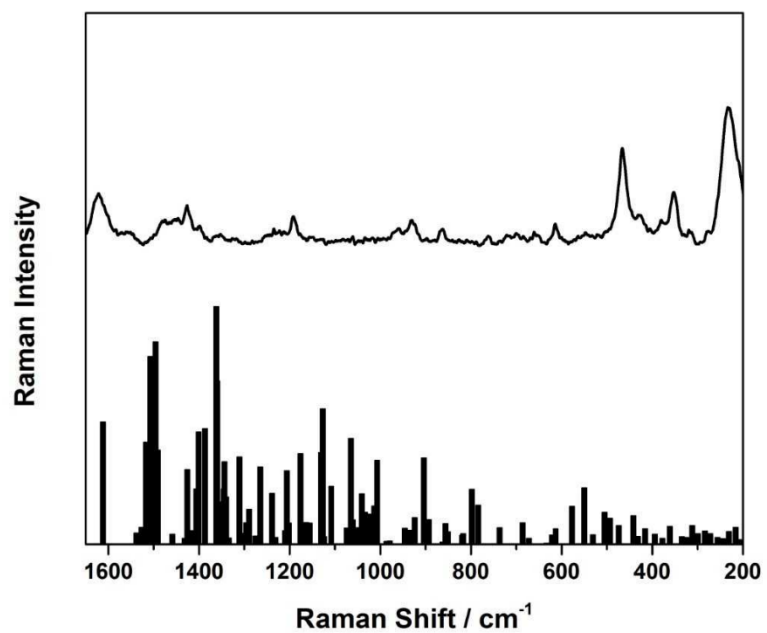

**Figure S-2.** Comparison of experimental EC-SERS signal obtained for THC at -0.4 V (top) with calculated normal Raman modes for THC using B3LYP/6-31G\* level of theory (bottom).



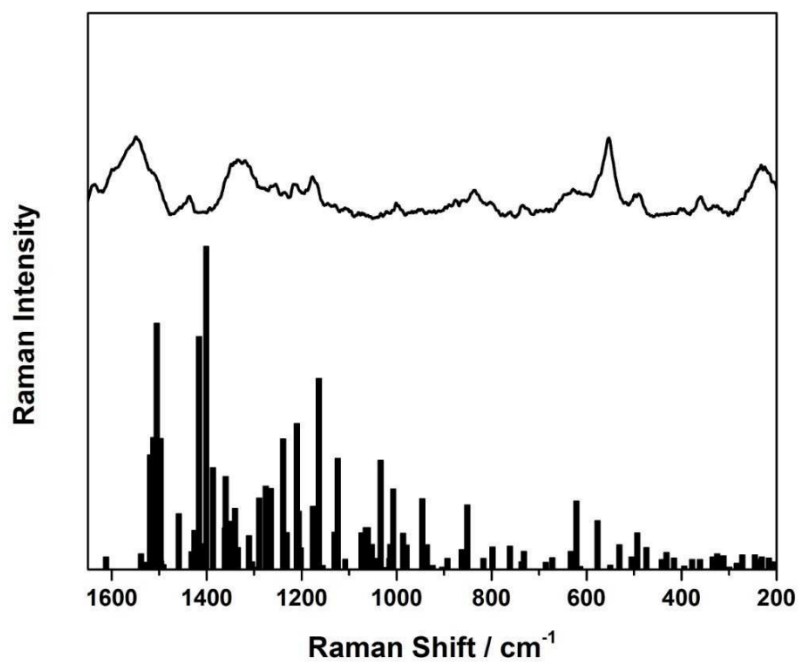

**Figure S-3.** Comparison of experimental EC-SERS signal obtained for THC-COOH at -0.4 V (top) with calculated normal Raman modes for THC-COOH using B3LYP/6-31G\* level of theory (bottom).
